# Supplementary material for: Acute Effects of Exercise Mode on Arterial Stiffness and Wave Reflection in Healthy Young Adults: A Systematic Review and Meta-Analysis
Source: PubMed Central journal article supplement (PMC5816907; doi:10.3389/fphys.2018.00073), 2018-02-13
Supplement: Table1.pdf [file Table1.pdf]

**Supplementary Table 1.** Risk of Bias summary

| <b>Study/Domain</b>        | <b>Selection bias<br/>(Random sequence generation)</b> | <b>Selection bias (Allocation concealment)</b> | <b>Performance bias (blinding of participants and personnel)</b> | <b>Detection bias (Blinding of outcome assessment)</b> | <b>Attrition bias (Incomplete outcome data)</b> | <b>Reporting bias (selective reporting)</b> |
|----------------------------|--------------------------------------------------------|------------------------------------------------|------------------------------------------------------------------|--------------------------------------------------------|-------------------------------------------------|---------------------------------------------|
| Barnes et al. (2010)       | ●                                                      | ●                                              | ●                                                                | ●                                                      | ●                                               | ●                                           |
| Boutcher et al. (2011)     | ●                                                      | ●                                              | ●                                                                | ●                                                      | ●                                               | ●                                           |
| Burr et al. (2015)         | ●                                                      | ●                                              | ●                                                                | ●                                                      | ●                                               | ●                                           |
| Campbell et al. (2011)     | ●                                                      | ●                                              | ●                                                                | ●                                                      | ●                                               | ●                                           |
| Chandrakumar et al. (2015) | ●                                                      | ●                                              | ●                                                                | ●                                                      | ●                                               | ●                                           |
| Collier et al. (2010)      | ●                                                      | ●                                              | ●                                                                | ●                                                      | ●                                               | ●                                           |
| Doonan et al. (2013)       | ●                                                      | ●                                              | ●                                                                | ●                                                      | ●                                               | ●                                           |
| Doonan et al. (2011)       | ●                                                      | ●                                              | ●                                                                | ●                                                      | ●                                               | ●                                           |
| Fahs et al. (2009)         | ●                                                      | ●                                              | ●                                                                | ●                                                      | ●                                               | ●                                           |
| Figuroa and Vicil (2011)   | ●                                                      | ●                                              | ●                                                                | ●                                                      | ●                                               | ●                                           |
| Gkaliagkousi et al. (2014) | ●                                                      | ●                                              | ●                                                                | ●                                                      | ●                                               | ●                                           |
| Hanssen et al. (2015)      | ●                                                      | ●                                              | ●                                                                | ●                                                      | ●                                               | ●                                           |
| Heffernan et al. (2007a)   | ●                                                      | ●                                              | ●                                                                | ●                                                      | ●                                               | ●                                           |
| Heffernan et al. (2007b)   | ●                                                      | ●                                              | ●                                                                | ●                                                      | ●                                               | ●                                           |
| Heffernan et al. (2007c)   | ●                                                      | ●                                              | ●                                                                | ●                                                      | ●                                               | ●                                           |
| Heffernan et al. (2007d)   | ●                                                      | ●                                              | ●                                                                | ●                                                      | ●                                               | ●                                           |
| Heffernan et al. (2006)    | ●                                                      | ●                                              | ●                                                                | ●                                                      | ●                                               | ●                                           |
| Hu et al. (2013)           | ●                                                      | ●                                              | ●                                                                | ●                                                      | ●                                               | ●                                           |
| Hull et al. (2011)         | ●                                                      | ●                                              | ●                                                                | ●                                                      | ●                                               | ●                                           |
| Kingsley et al. (2016)     | ●                                                      | ●                                              | ●                                                                | ●                                                      | ●                                               | ●                                           |
| Kingwell et al. (1997)     | ●                                                      | ●                                              | ●                                                                | ●                                                      | ●                                               | ●                                           |
| Kobayashi et al. (2017)    | ●                                                      | ●                                              | ●                                                                | ●                                                      | ●                                               | ●                                           |
| Lane et al. (2013)         | ●                                                      | ●                                              | ●                                                                | ●                                                      | ●                                               | ●                                           |

| <b>Study/Domain</b>      | <b>Selection bias (Random sequence generation)</b> | <b>Selection bias (Allocation concealment)</b> | <b>Performance bias (blinding of participants and personnel)</b> | <b>Detection bias (Blinding of outcome assessment)</b> | <b>Attrition bias (Incomplete outcome data)</b> | <b>Reporting bias (selective reporting)</b> |
|--------------------------|----------------------------------------------------|------------------------------------------------|------------------------------------------------------------------|--------------------------------------------------------|-------------------------------------------------|---------------------------------------------|
| Lefferts et al. (2015)   | ●                                                  | ●                                              | ●                                                                | ●                                                      | ●                                               | ●                                           |
| Lin <i>et al.</i> (2016) | ●                                                  | ●                                              | ●                                                                | ●                                                      | ●                                               | ●                                           |
| Lydakakis et al. (2008)  | ●                                                  | ●                                              | ●                                                                | ●                                                      | ●                                               | ●                                           |
| Mak and Lai (2015)       | ●                                                  | ●                                              | ●                                                                | ●                                                      | ●                                               | ●                                           |
| Melo et al. (2016)       | ●                                                  | ●                                              | ●                                                                | ●                                                      | ●                                               | ●                                           |
| Milatz et al. (2015)     | ●                                                  | ●                                              | ●                                                                | ●                                                      | ●                                               | ●                                           |
| Moore et al. (2016)      | ●                                                  | ●                                              | ●                                                                | ●                                                      | ●                                               | ●                                           |
| Munir et al. (2008)      | ●                                                  | ●                                              | ●                                                                | ●                                                      | ●                                               | ●                                           |
| Perdomo et al. (2016)    | ●                                                  | ●                                              | ●                                                                | ●                                                      | ●                                               | ●                                           |
| Peres et al. (2010)      | ●                                                  | ●                                              | ●                                                                | ●                                                      | ●                                               | ●                                           |
| Ranadive et al. (2012)   | ●                                                  | ●                                              | ●                                                                | ●                                                      | ●                                               | ●                                           |
| Ribeiro et al. (2014)    | ●                                                  | ●                                              | ●                                                                | ●                                                      | ●                                               | ●                                           |
| Sharman et al. (2008)    | ●                                                  | ●                                              | ●                                                                | ●                                                      | ●                                               | ●                                           |
| Siasos et al. (2016a)    | ●                                                  | ●                                              | ●                                                                | ●                                                      | ●                                               | ●                                           |
| Siasos et al. (2016b)    | ●                                                  | ●                                              | ●                                                                | ●                                                      | ●                                               | ●                                           |
| Sugawara et al. (2015)   | ●                                                  | ●                                              | ●                                                                | ●                                                      | ●                                               | ●                                           |
| Sun et al. (2015)        | ●                                                  | ●                                              | ●                                                                | ●                                                      | ●                                               | ●                                           |
| Tai et al. (2018)        | ●                                                  | ●                                              | ●                                                                | ●                                                      | ●                                               | ●                                           |
| Thiebaud et al. (2016)   | ●                                                  | ●                                              | ●                                                                | ●                                                      | ●                                               | ●                                           |
| Yan et al. (2014)        | ●                                                  | ●                                              | ●                                                                | ●                                                      | ●                                               | ●                                           |
| Yan et al. (2017)        | ●                                                  | ●                                              | ●                                                                | ●                                                      | ●                                               | ●                                           |
| Yoon et al. (2010)       | ●                                                  | ●                                              | ●                                                                | ●                                                      | ●                                               | ●                                           |

● = low risk, ● = unclear risk, ● = high risk
